# Supplementary material for: Characterization of Nanoprecipitated PET Nanoplastics by <sup>1</sup>H NMR and Impact of Residual Ionic Surfactant on Viability of Human Primary Mononuclear Cells and Hemolysis of Erythrocytes
Source: Preprints.org preprint supplement (doi:10.20944/preprints202311.0087.v1), 2023-11-02
Supplement: Supplementary file 1 [file supplementary]

**Supplementary material**

**Characterization of nanoprecipitated PET nanoplastics by**  **1H NMR and impact of residual ionic surfactant on viability of human primary mononuclear cells and hemolysis of erythrocytes**

Milica Djapovic1, Danijela Apostolovic2, Vojislava Postic1, Tamara Lujic1, Vesna Jovanovic1, Dragana Stanic-Vucinic1, Marianne van Hagew, Veselin Maslak1* and Tanja Cirkovic Velickovic1,3*

1University of Belgrade - Faculty of Chemistry, Studentski trg 16, Belgrade, Serbia

2Immunology and Allergy Division, Center for Molecular Medicine, Department of Medicine

Solna, Karolinska Institutet, Stockholm, Sweden

3Serbian Academy of Sciences and Arts, Knez Mihajlova 35, Belgrade, Serbia

***Corresponding author**

E-mail address: tcirkov@chem.bg.ac.rs (T Cirkovic Velickovic); [vmaslak@chem.bg.ac.rs](mailto:vmaslak@chem.bg.ac.rs) (V. Maslak)

**Preparation of PET NPs**

**
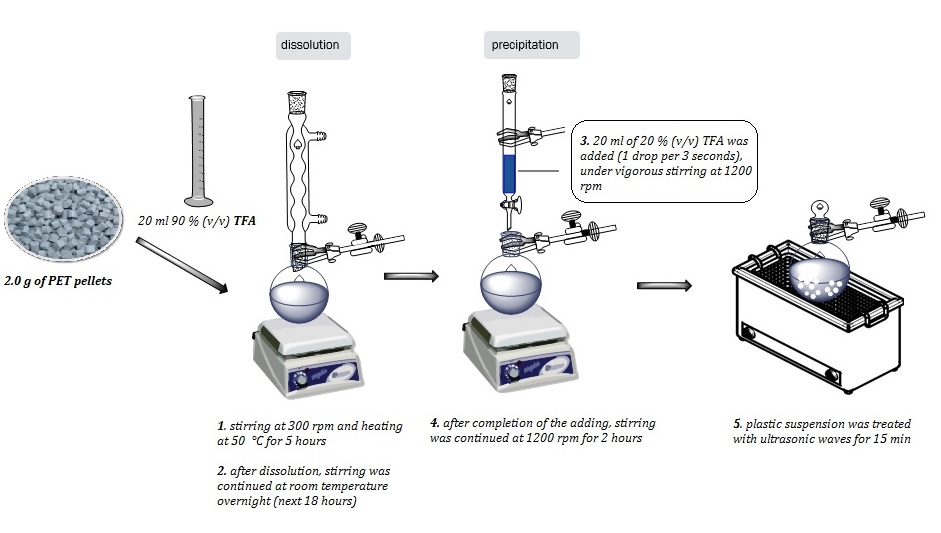
**

**Figure S1.** Overall scheme of nPET production procedure. First, 2.0 g of PET pellets was dissolved in 20.0 mL of TFA in Mili-Q water (*v/v)* with stirring at 300 rpm for five hours at 50 °C and next 18h at room temperature. Then, 20 mL of 20% TFA in Milli-Q water (*v/v)* was added dropwise during 110 min (1 drop of 10 μL per 3 s), under vigorous stirring at 1200 rpm using a dropping funnel. Stirring of suspension was continued for an additional 2 hours, before being sonicated in an ultrasonic bath for 15 min.


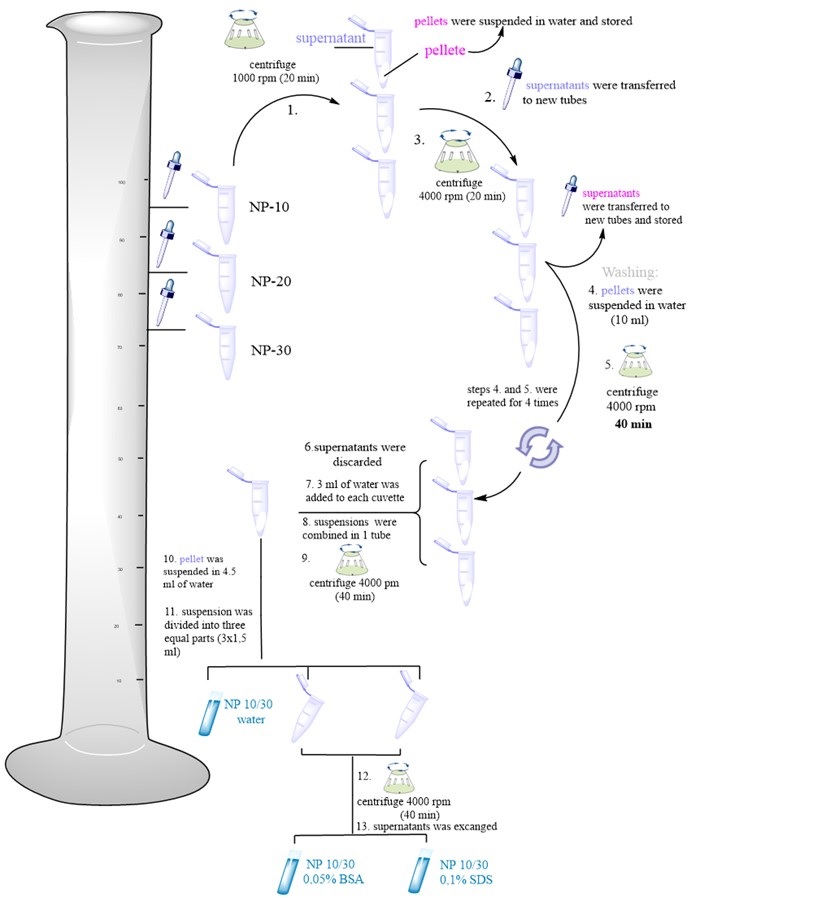


**Figure S2.** Schematic illustration of washing and size separation processes of the first three fractions (each 10 mL), denoted NP-10, NP-20 and NP-30.

**Characterization of PET NPs**


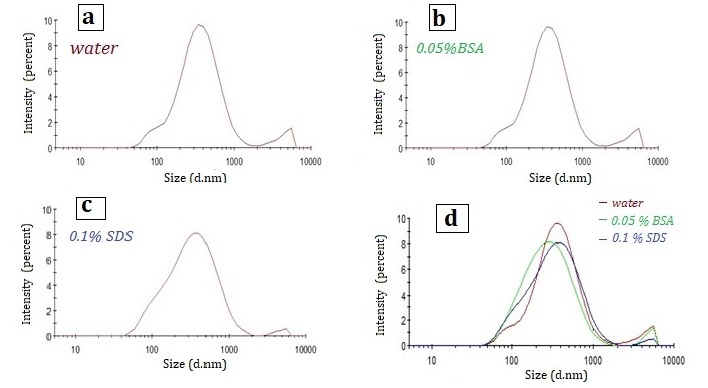


**Figure S3.** Size distributions (by **intensity percentage**) of **NPs washed** suspended in different dispersants: **water, BSA (0.05%) and SDS (0.1 %)** are presented. Size distributions are shown for NPs obtained from combinated fractions: **NP-10, NP-20 and NP-30**.


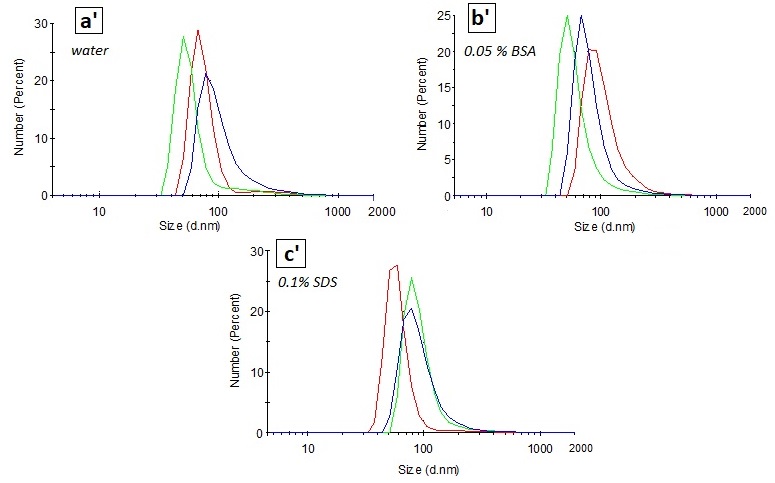


**Figure S4.** Size distributions (by **number percentage**) of **NPs washed** suspended in different dispersants: **water, BSA (0.05%) and SDS (0.1 %)** are presented. Distributions are shown for NPs obtained from combinated fractions: **NP-10, NP-20 and NP-30**. Additionally multiple consecutive measurements (lines with different colors) are presented.

**Table S1.** Hydrodynamic diameter (d.nm) and polydispersity index of **NPs washed** obtained from combined fractions: NP-10, NP-20 and NP-30 (denoted **NP-10**+**NP-20+NP-30**); NP-40, NP-50 and NP-60 (denoted **NP-40+NP-50+NP-60**); NP-70, NP-80 and NP-90 (denoted **NP-70+NP-80+NP-90**) dispersed in different dispersants: water, 0.05% BSA and 0.1% SDS.

|  | dispersant | **NPS washed** | | |
| --- | --- | --- | --- | --- |
|  | NP-10+NP-20+NP+  NP-30 | NP-40+NP-50+  NP-60 | NP-70+NP-80+  NP-90 |
| Z-Average  (d.nm) | water | 311.7 ± 4.4 | 182.3 ± 3.4 | 262.5 ± 9.6 |
| 0.05% BSA | 243.5 ± 1.3 | 264.6 ± 7.2 | 230.7 ± 1.1 |
| 0.1 % SDS | 265.7 ± 5.9 | 256.8 ± 3.3 | 215.6 ± 1.6 |
| Polydispersity index | water | 0.375 ± 0.026 | 0.309 ± 0.034 | 0.540 ± 0.073 |
| 0.05% BSA | 0.352 ± 0.037 | 0.271 ± 0.010 | 0.269 ± 0.011 |
| 0.1 % SDS | 0.351 ± 0.041 | 0.336 ± 0.026 | 0.260 ± 0.050 |


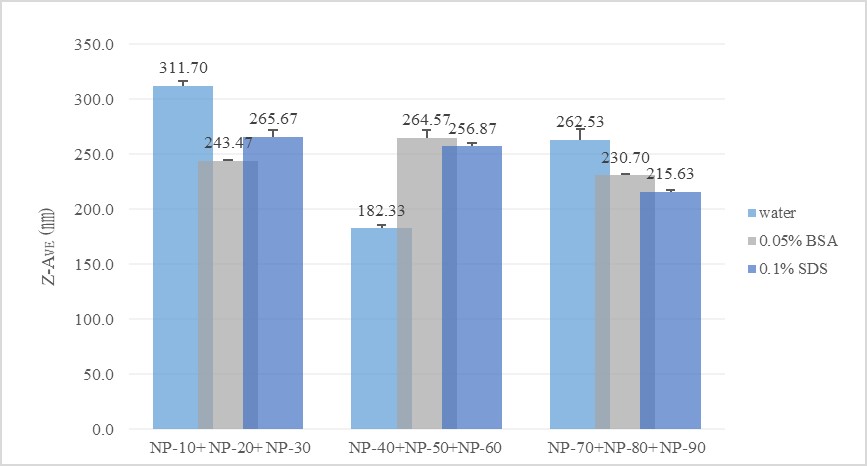
**Figure S5.** Hydrodynamic diameter (d.nm) of **NPs washed** obtained from combined fractions: NP-10, NP-20 and NP- 30 (denoted **NP-10**+**NP-20+NP-30**); NP-40, NP-50 and NP-60 (denoted **NP-40+NP-50+NP-60**); NP-70, NP-80 and NP-90 (denoted **NP-70+NP-80+NP-90**) dispersed in different dispersants: water, 0.05% BSA and 0.1% SDS.


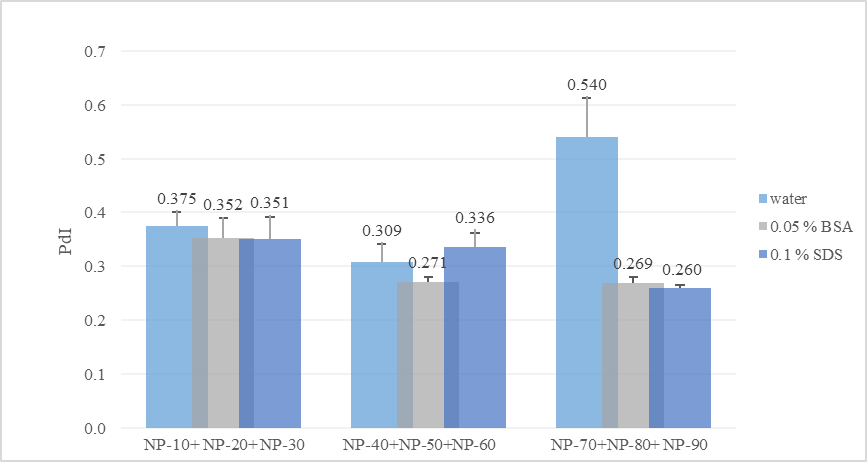


**Figure S6.** Polydispersity index of **NPs washed** obtained from combined fractions: NP-10, NP-20 and NP- 30 (denoted **NP-10**+**NP-20+NP-30**); NP-40, NP-50 and NP-60 (denoted **NP-40+NP-50+NP-60**); NP-70, NP-80 and NP-90 (denoted **NP-70+NP-80+NP-90**) dispersed in different dispersants: water, 0.05% BSA and 0.1% SDS.


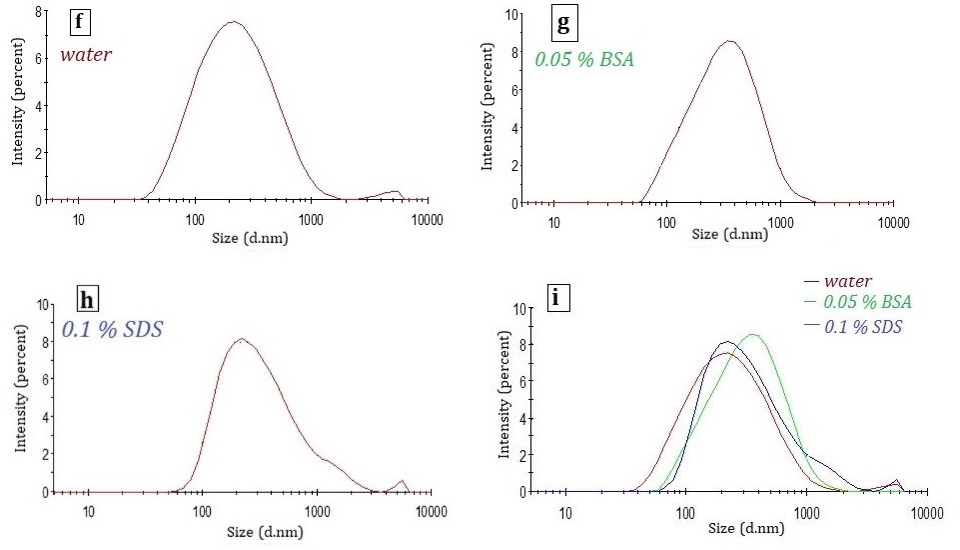


**Figure S7.** Size distributions (by **intensity percentage**) of **NPs washed** suspended in different dispersants: **water, BSA (0.05%) and SDS (0.1 %)** are presented. Size distributions are shown for NPs obtained from combinated fractions: **NP-40, NP-50 and NP-60**.


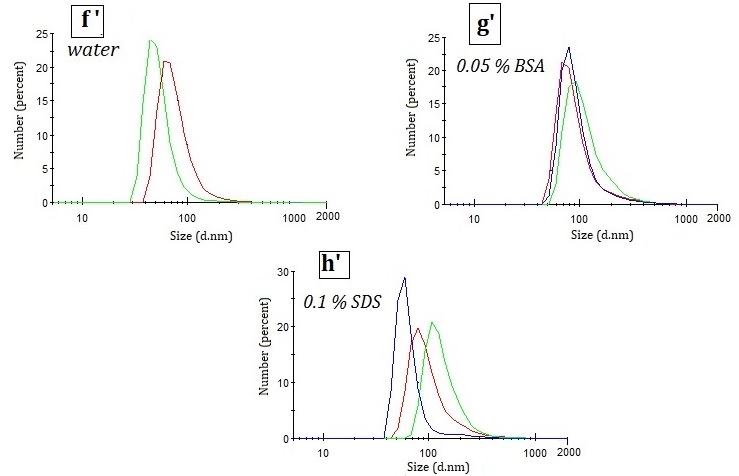


**Figure S8.** Size distributions (by **number percentage**) of **NPs washed** suspended in different dispersants: **water, BSA (0.05%) and SDS (0.1 %)** are presented. Distributions are shown for NPs obtained from combinated fractions: **NP-40, NP-50 and NP-60**. Additionally multiple consecutive measurements (lines with different colors) are presented.


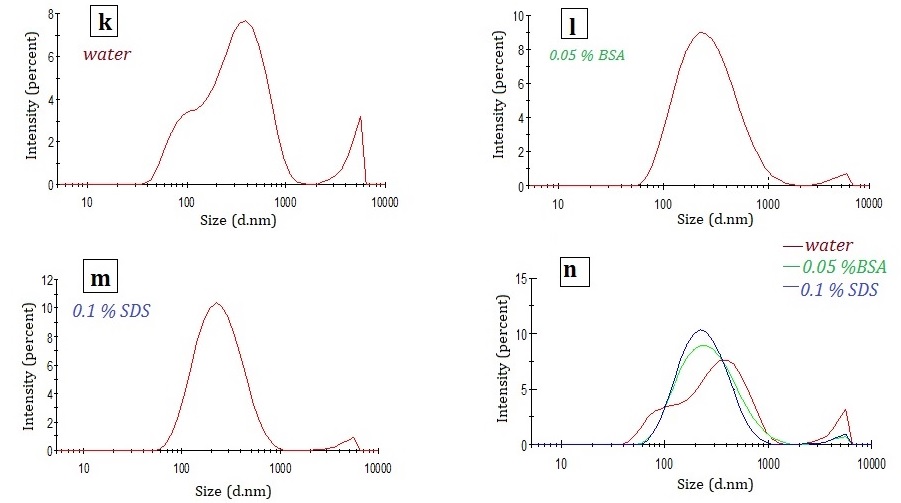


**Figure S9.** Size distributions (by **intensity percentage**) of **NPs washed** suspended in different dispersants: **water, BSA (0.05%) and SDS (0.1 %)** are presented. Size distributions are shown for NPs obtained from combinated fractions: **NP-70, NP-80 and NP-90**.


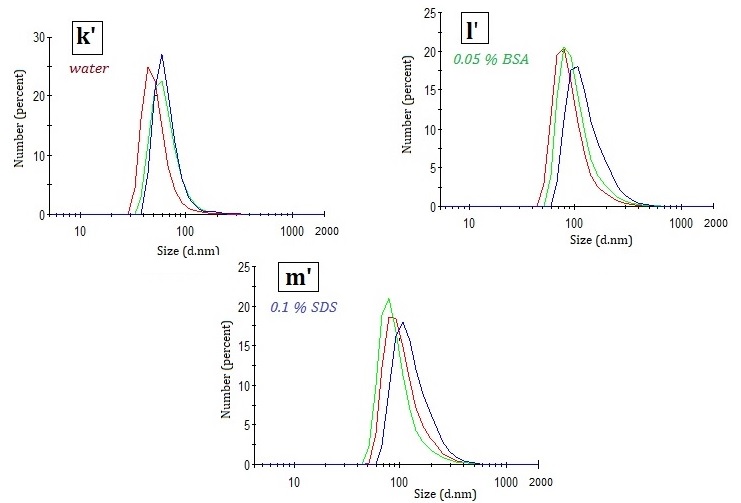
**Figure S10.** Size distributions (by **number percentage**) of **NPs washed** suspended in different dispersants: **water, BSA (0.05%) and SDS (0.1 %)** are presented. Distributions are shown for NPs obtained from combinated fractions: **NP-70, NP-80 and NP-90**. Additionally multiple consecutive measurements (lines with different colors) are presented.


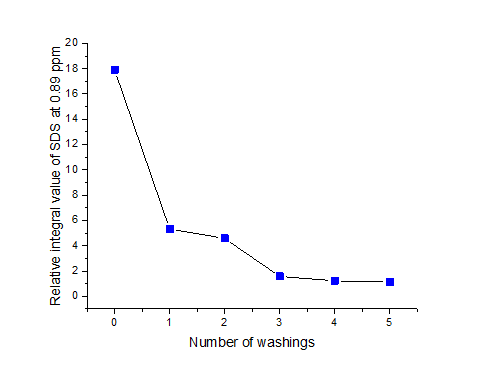


**Figure S11.** Relative quantification of SDS contamination in relation to PET signal in NMR.


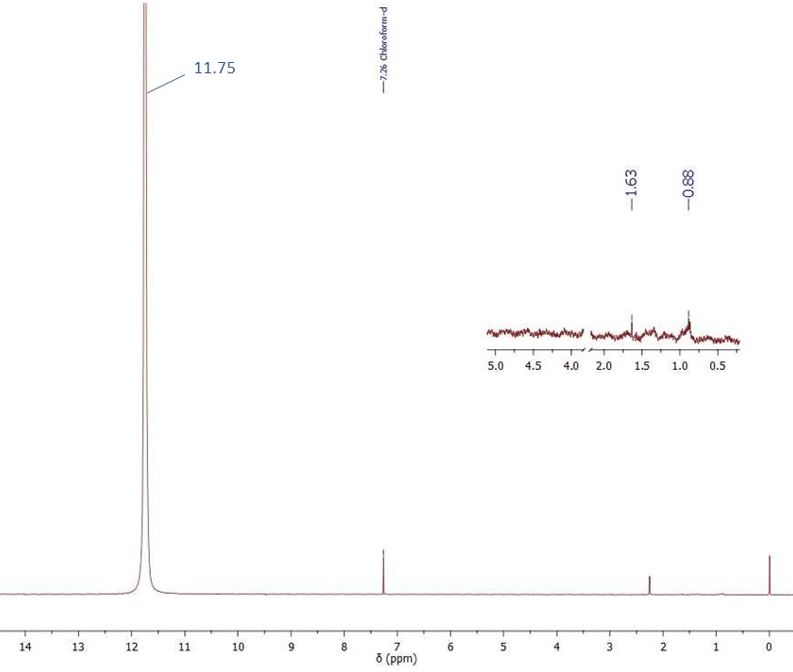
**Figure S12.** 1H NMR spectrum (400 MHz) of trifluoroacetic acid (TFA) recording with addition of deuterated chloroform (CDCl3) in the ratio 4:1 (*v,v, respectively*). Region importance for process monitoring of washing process of NPs (0.5- 2.0 ppm and 4.0- 5 .0 ppm) is zoomed. Signal at 11.75 ppm originates from TFA; signals with chemical shifts values 0.88 and 1.63 ppm indicate the presence of impurities in very low concentrations.


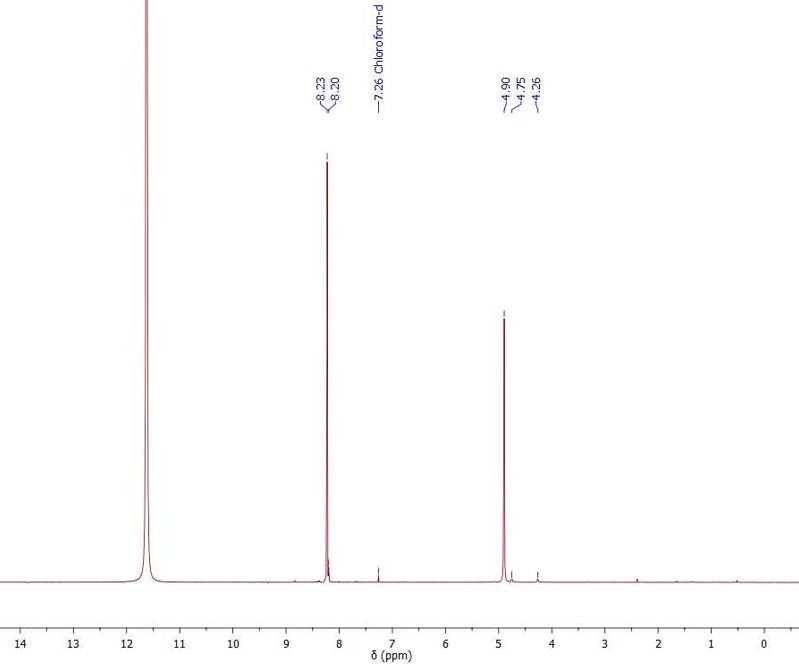


**Figure S13**. 1H NMR spectrum (400 MHz) of PET pellet (starting material) recorded in the mixture of TFA and CDCl3 in the ratio 4:1 (*v/v*). The use of this mixture containing the fluorinated solvent is advantageous, since it allows room temperature spectra [[](https://www.zotero.org/google-docs/?0WzQfx)1[]](https://www.zotero.org/google-docs/?hCGZdV). Characteristic signals at 8.20- 8.23 (aromatic protons), 4.90 (internal methylene groups), and low intensity signals at 4.75 and 4.26 ppm (the methylene protons adjacent to the hydroxyl end functions) are consistent with reported literature data [[](https://www.zotero.org/google-docs/?0WzQfx)2,3[]](https://www.zotero.org/google-docs/?hCGZdV).


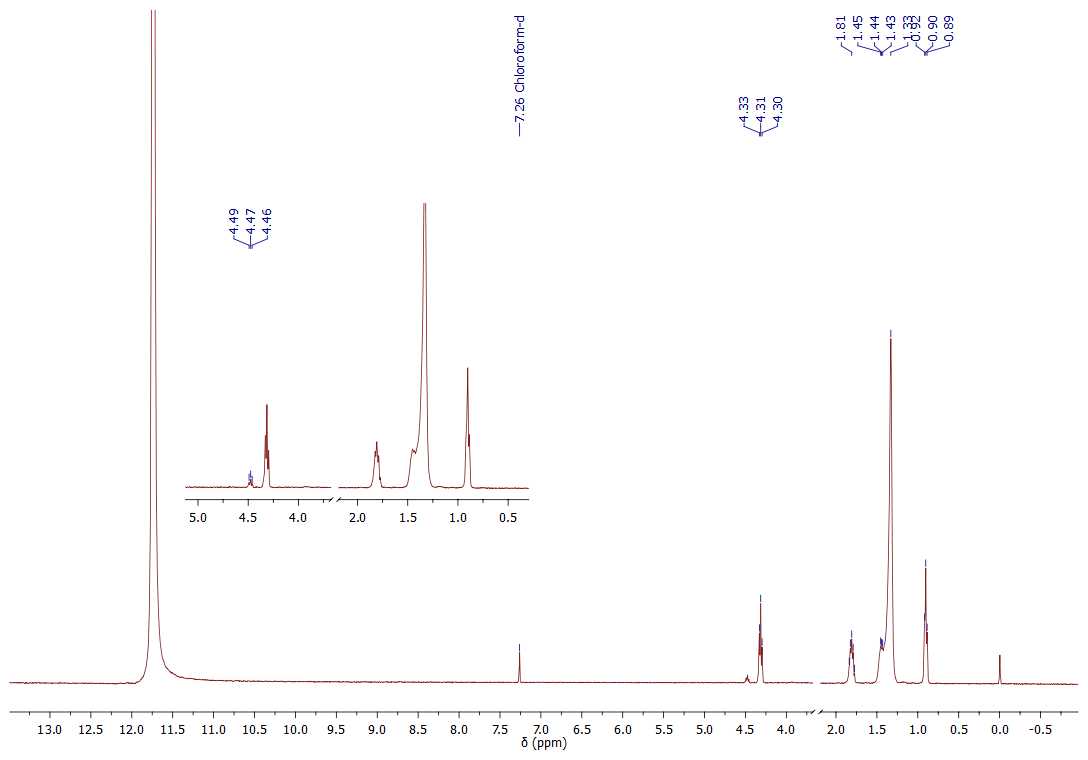


**Figure S14**. 1H NMR spectrum (400 MHz) of sodium dodecyl sulfate (SDS) recorded in the mixture of TFA and CDCl3 in the ratio 4:1 (*v/v*). The peaks at regions 0.89-0.92, 1.33-1.45, 1.81 and 4.30-4.33 ppm originate from SDS. In the magnified part of the spectrum a low intensity signal with chemical shift of 4.46-4.49 ppm is visible. The intensity of this impurity decreases during the washing process of NPs from SDS; already after third washing, this peak is not visible in the NMR spectrum (Figure 1B).

**References:**

1. Fox, B.; Moad, G.; Van Diepen, G.; Willing, I.; Cook, W. D. Characterization of poly(ethylene terephthalate) and poly(ethylene terephthalate) blends. *Polymer,* ***1997****, 38(12), 3035-3043,* doi:10.1016/s0032-3861(96)00872-5.
2. El Mejjatti, A.; Harit, T.; Riahi, A.; Khiari, R.; Bouabdallah, I.; Malek, F. Chemical recycling of poly(ethylene terephthalate). Application to the synthesis of multiblock copolyesters. *EXPRESS Polym. Lett.* ***2014***, 8, 544553, doi: doi:10.3144/expresspolymlett.2014.58.
3. Saint-Loup, R.; Jeanmaire, T.; Robin, J.J.; Boutevin, B. Synthesis of (polyethylene terephthalate/polyϵ-caprolactone) copolyesters. *Polymer,* ***2003****, 44, 3437-3449*, doi: 10.1016/S0032-3861(03)00257-X.
